# Supplementary material
Source: publisher figshare collection journal article supplement (https://rs.figshare.com/ndownloader/files/14605931)
Supplement: Supplementary file 1 [file 14605931]

## Sheet: trait_table
Species	Red.List	Abundance	Population.trend	Pollen.specialisation	Nest.location	Sociality	Mean.flight.month	Duration.of.activity	Size.mean	Altitude.mean	Forest	Raw.soil	Urban.areas	Meadows	Hedgerows	Wasteland	Habitat.breadth
Dufourea halictula (NYLANDER, 1852)	4	4	4	oligolectic	ground	solitary	7.5	2	4.5	400	0	1	0	0	0	1	2
Hylaeus clypearis (SCHENCK, 1853)	1	3	2	polylectic	above	solitary	7.5	4	4.5	800	0	0	0	0	1	1	2
Hylaeus pictipes NYLANDER, 1852	1	3	2	polylectic	above	solitary	7	3	4.5	800	0	1	0	0	1	1	3
Hylaeus styriacus FÖRSTER, 1871	1	3	2	polylectic	above	solitary	7	3	4.5	800	1	0	0	0	1	1	3
Lasioglossum glabriusculum (MORAWITZ, 1872)	1	3	2	polylectic	ground	social	7	7	4.5	800	0	1	0	0	0	1	2
Lasioglossum lucidulum (SCHENCK, 1861)	1	2	2	polylectic	ground	solitary	7	7	4.5	400	0	1	0	1	1	1	4
Lasioglossum minutissimum (KIRBY, 1802)	1	4	2	polylectic	ground	solitary	6.5	6	4.5	800	0	1	0	1	0	1	3
Lasioglossum politum (SCHENCK, 1853)	1	3	2	polylectic	ground	social	6.5	8	4.5	400	0	1	1	1	0	1	4
Nomada bluethgeni STÖCKHERT, 1943	6	7	6	cuckoo	host nest	cuckoo	6	5	4.5	400	0	1	0	1	0	0	2
Nomioides minutissimus (ROSSI, 1790)	4	6	4	polylectic	ground	solitary	7	3	4.5	400	0	1	0	0	0	0	1
Stelis minima SCHENCK, 1861	1	4	2	cuckoo	host nest	cuckoo	7	3	4.5	800	0	0	1	1	1	1	4
Hylaeus brevicornis NYLANDER, 1852	1	2	2	polylectic	above	solitary	7.5	4	5	800	0	0	1	1	1	1	4
Hylaeus gracilicornis (MORAWITZ, 1867)	1	4	insufficient data	polylectic	above	solitary	7	3	5	400	1	1	0	0	1	0	3
Hylaeus moricei (FRIESE, 1898)	3	4	3	polylectic	above	solitary	7	3	5	400	1	0	0	0	1	1	3
Lasioglossum aeratum (KIRBY, 1802)	3	4	3	polylectic	ground	social	6.5	6	5	1050	0	1	0	0	0	1	2
Lasioglossum marginellum (SCHENCK, 1853)	4	5	3	polylectic	ground	solitary	6.5	4	5	400	0	1	0	0	0	0	1
Sphecodes longulus VON HAGENS, 1882	1	3	2	cuckoo	host nest	cuckoo	6	7	5.25	800	1	1	1	1	1	1	6
Halictus smaragdulus VACHAL, 1895	3	4	3	polylectic	ground	social	6	5	5.5	800	0	1	0	0	0	1	2
Hylaeus gredleri FÖRSTER, 1871	1	2	2	polylectic	above	solitary	7	3	5.5	800	1	0	1	0	1	1	4
Hylaeus kahri FÖRSTER, 1871	1	4	insufficient data	polylectic	above	solitary	7.5	4	5.5	800	0	0	0	0	0	1	1
Hylaeus leptocephalus (MORAWITZ, 1870)	1	3	2	polylectic	above	solitary	7	5	5.5	800	0	0	1	0	1	1	3
Hylaeus lineolatus (SCHENCK, 1861)	3	4	3	polylectic	above	solitary	7.5	4	5.5	400	0	1	0	0	1	0	2
Hylaeus punctatus (BRULLÉ, 1832)	1	3	2	polylectic	above	solitary	6.5	4	5.5	400	0	0	1	0	1	1	3
Hylaeus sinuatus (SCHENCK, 1853)	1	3	2	polylectic	above	solitary	7	3	5.5	800	1	0	0	0	1	1	3
Lasioglossum cupromicans (PÉREZ, 1903)	3	5	insufficient data	polylectic	ground	solitary	6.5	6	5.5	1900	0	1	0	0	0	0	1
Lasioglossum morio (FABRICIUS, 1793)	1	1	2	polylectic	ground	social	6.5	8	5.5	1050	1	1	1	1	1	1	6
Lasioglossum pauxillum (SCHENCK, 1853)	1	1	2	polylectic	ground	social	6.5	8	5.5	800	1	1	1	1	1	1	6
Lasioglossum semilucens (ALFKEN, 1914)	1	3	2	polylectic	ground	solitary	5	6	5.5	400	0	1	0	0	1	1	3
Lasioglossum tarsatum (SCHENCK, 1868)	4	4	4	polylectic	ground	solitary	6	5	5.5	400	0	1	0	0	0	0	1
Nomada distinguenda MORAWITZ, 1874	3	4	insufficient data	cuckoo	host nest	cuckoo	7	7	5.5	800	1	1	1	1	1	1	6
Nomada kohli SCHMIEDEKNECHT, 1882	4	4	4	cuckoo	host nest	cuckoo	6.5	4	5.5	400	0	1	0	1	1	1	4
Sphecodes geoffrellus (KIRBY, 1802)	1	2	2	cuckoo	host nest	cuckoo	7	7	5.5	1500	1	1	1	1	1	1	6
Sphecodes hyalinatus VON HAGENS, 1882	1	1	2	cuckoo	host nest	cuckoo	7	7	5.5	1050	1	1	1	1	1	1	6
Sphecodes marginatus VON HAGENS, 1882	1	3	insufficient data	cuckoo	host nest	cuckoo	6.5	4	5.5	800	0	1	0	0	0	0	1
Sphecodes miniatus VON HAGENS, 1882	1	3	insufficient data	cuckoo	host nest	cuckoo	6.5	6	5.5	1500	1	1	1	1	1	1	6
Sphecodes niger VON HAGENS, 1874	1	3	2	cuckoo	host nest	cuckoo	7	7	5.5	1050	1	1	1	1	1	1	6
Stelis breviuscula (NYLANDER, 1848)	1	2	2	cuckoo	host nest	cuckoo	7	5	5.5	800	0	0	0	1	1	0	2
Stelis minuta LEPELETIER & SERVILLE, 1825	1	4	insufficient data	cuckoo	host nest	cuckoo	7.5	4	5.5	800	0	1	0	0	1	1	3
Andrena minutula (KIRBY, 1802)	1	1	2	polylectic	ground	solitary	5.5	6	6	1050	1	1	1	1	1	1	6
Dufourea alpina MORAWITZ, 1865	unknown	6	2	polylectic	ground	solitary	7	3	6	1900	0	1	0	0	0	0	1
Dufourea minuta LEPELETIER, 1841	3	4	3	oligolectic	ground	solitary	7.5	4	6	1450	1	0	0	0	0	0	1
Lasioglossum intermedium (SCHENCK, 1868)	3	4	3	polylectic	ground	solitary	6	5	6	1800	0	1	0	0	0	0	1
Lasioglossum lissonotum (NOSKIEWICZ, 1926)	4	5	3	polylectic	ground	social	6	5	6	800	0	1	0	0	0	1	2
Lasioglossum nitidiusculum (KIRBY, 1802)	2	3	3	polylectic	ground	solitary	6.5	6	6	400	0	1	0	0	1	1	3
Lasioglossum nitidulum (FABRICIUS, 1804)	1	2	2	polylectic	ground	social	6.5	8	6	800	0	1	1	0	0	0	2
Lasioglossum parvulum (SCHENCK, 1853)	2	4	3	polylectic	ground	solitary	7	7	6	800	1	1	1	1	1	1	6
Lasioglossum pygmaeum (SCHENCK, 1853)	3	4	insufficient data	polylectic	ground	solitary	6.5	6	6	400	0	1	0	0	0	1	2
Nomada atroscutellaris STRAND, 1921	2	3	3	cuckoo	host nest	cuckoo	5	3	6	800	0	1	1	1	1	1	5
Nomada discedens PÉREZ, 1884	5	6	insufficient data	cuckoo	host nest	cuckoo	6	1	6	400	0	1	0	0	0	0	1
Nomada flavoguttata (KIRBY, 1802)	1	1	2	cuckoo	host nest	cuckoo	5.5	6	6	1050	1	1	1	1	1	1	6
Nomada fuscicornis NYLANDER, 1848	1	3	2	cuckoo	host nest	cuckoo	7.5	4	6	800	0	1	0	0	1	1	3
Nomada obtusifrons NYLANDER, 1848	4	4	4	cuckoo	host nest	cuckoo	7.5	2	6	1050	1	1	0	0	1	0	3
Nomada sheppardana (KIRBY, 1802)	1	1	2	cuckoo	host nest	cuckoo	5.5	6	6	800	1	1	0	0	1	1	4
Sphecodes puncticeps THOMSON, 1870	1	3	2	cuckoo	host nest	cuckoo	6.5	6	6	800	0	1	0	0	0	1	2
Andrena alfkenella PERKINS, 1914	2	4	3	polylectic	ground	solitary	6.5	4	6.5	800	0	0	0	1	1	1	3
Andrena falsifica PERKINS, 1915	1	3	2	polylectic	ground	solitary	4	3	6.5	800	1	0	0	1	1	1	4
Andrena minutuloides PERKINS, 1914	1	1	2	polylectic	ground	solitary	6.5	6	6.5	800	1	1	1	1	1	1	6
Andrena potentillae PANZER, 1809	4	5	3	oligolectic	ground	solitary	4	3	6.5	400	0	1	0	0	0	1	2
Andrena semilaevis PÉREZ, 1903	3	4	3	polylectic	ground	solitary	6	3	6.5	1050	0	1	0	1	1	1	4
Anthidium strigatum (PANZER, 1805)	2	3	4	polylectic	above	solitary	7	3	6.5	800	0	1	1	0	1	1	4
Camptopoeum frontale (FABRICIUS, 1804)	4	6	3	oligolectic	ground	solitary	7.5	2	6.5	400	0	1	0	0	0	0	1
Ceratina cyanea (KIRBY, 1802)	1	2	2	polylectic	above	solitary	7	7	6.5	800	0	0	1	1	1	1	4
Epeolus alpinus FRIESE, 1893	unknown	6	2	cuckoo	host nest	cuckoo	6.5	2	6.5	1500	0	1	0	0	0	0	1
Hylaeus cardioscapus COCKERELL, 1924	unknown	6	insufficient data	polylectic	above	solitary	7	3	6.5	400	0	0	0	0	1	0	1
Hylaeus communis NYLANDER, 1852	1	1	2	polylectic	above	solitary	7.5	6	6.5	1050	0	1	1	0	1	0	3
Hylaeus dilatatus (KIRBY, 1802)	1	3	2	polylectic	above	solitary	7.5	4	6.5	800	0	1	0	0	1	1	3
Hylaeus hyalinatus SMITH, 1842	1	1	2	polylectic	above	solitary	7	5	6.5	800	0	1	1	1	1	1	5
Hylaeus rinki (GORSKI, 1852)	1	4	2	polylectic	above	solitary	7	3	6.5	800	1	0	0	0	1	0	2
Lasioglossum brevicorne (SCHENCK, 1868)	3	4	3	oligolectic	ground	social	7	7	6.5	800	0	1	0	0	1	0	2
Lasioglossum convexiusculum (SCHENCK, 1853)	4	5	3	polylectic	ground	solitary	6.5	4	6.5	800	0	0	0	0	0	1	1
Lasioglossum fulvicorne (KIRBY, 1802)	1	1	2	polylectic	ground	solitary	6.5	8	6.5	1050	1	1	1	1	1	1	6
Lasioglossum interruptum (PANZER, 1798)	3	3	4	polylectic	ground	social	7	7	6.5	800	0	0	0	1	0	1	2
Lasioglossum laticeps (SCHENCK, 1868)	1	2	2	polylectic	ground	social	6.5	8	6.5	800	0	1	0	1	1	1	4
Lasioglossum minutulum (SCHENCK, 1853)	3	4	3	polylectic	ground	solitary	6.5	6	6.5	800	0	0	0	1	0	1	2
Lasioglossum punctatissimum (SCHENCK, 1853)	1	3	2	polylectic	ground	solitary	7	7	6.5	400	0	1	0	0	1	1	3
Lasioglossum puncticolle (MORAWITZ, 1872)	3	4	3	polylectic	ground	social	7	7	6.5	400	0	1	0	1	1	1	4
Lasioglossum quadrisignatum (SCHENCK, 1853)	4	5	3	polylectic	ground	solitary	6.5	6	6.5	800	0	0	0	0	1	1	2
Lasioglossum rufitarse (ZETTERSTEDT, 1838)	1	3	2	polylectic	ground	solitary	7	7	6.5	1050	1	1	0	0	1	0	3
Lasioglossum sexstrigatum (SCHENCK, 1868)	1	3	2	polylectic	ground	solitary	7	7	6.5	400	1	1	1	0	0	1	4
Lasioglossum tricinctum (SCHENCK, 1874)	3	4	3	polylectic	ground	social	6.5	6	6.5	400	0	1	0	0	0	1	2
Lasioglossum villosulum (KIRBY, 1802)	1	2	2	polylectic	ground	solitary	6.5	8	6.5	800	1	1	1	1	1	1	6
Nomada errans LEPELETIER, 1841	4	5	3	cuckoo	host nest	cuckoo	7	3	6.5	400	0	1	1	1	1	1	5
Nomada posthuma BLÜTHGEN, 1949	unknown	5	insufficient data	cuckoo	host nest	cuckoo	6	3	6.5	400	1	0	0	0	0	0	1
Osmia andrenoides SPINOLA, 1808	4	4	4	oligolectic	above	solitary	6.5	4	6.5	800	0	1	0	0	0	1	2
Osmia crenulata (NYLANDER, 1856)	1	3	2	oligolectic	above	solitary	7.5	4	6.5	800	0	0	0	1	1	0	2
Osmia truncorum (LINNAEUS, 1758)	1	2	2	oligolectic	above	solitary	7.5	4	6.5	800	0	0	0	1	1	0	2
Osmia versicolor LATREILLE, 1811	5	6	4	polylectic	above	solitary	5.5	4	6.5	800	0	1	0	0	0	1	2
Osmia viridana MORAWITZ, 1874	4	6	3	polylectic	above	solitary	5.5	4	6.5	800	0	1	0	0	0	1	2
Panurginus herzi MORAWITZ, 1892	unknown	6	2	polylectic	ground	solitary	7	3	6.5	1450	0	0	0	1	0	0	1
Panurginus montanus GIRAUD, 1861	1	4	2	oligolectic	ground	solitary	7	3	6.5	1900	0	0	0	1	0	0	1
Sphecodes crassus THOMSON, 1870	1	1	2	cuckoo	host nest	cuckoo	7	7	6.5	1050	1	1	1	1	1	1	6
Sphecodes croaticus MEYER, 1922	4	4	insufficient data	cuckoo	host nest	cuckoo	7.5	6	6.5	800	0	1	0	0	0	1	2
Stelis odontopyga NOSKIEWICZ, 1926	3	4	3	cuckoo	host nest	cuckoo	7	3	6.5	1050	0	1	0	1	1	0	3
Stelis ornatula (KLUG, 1807)	1	3	2	cuckoo	host nest	cuckoo	6	5	6.5	1050	0	1	0	0	1	1	3
Stelis signata (LATREILLE, 1809)	3	4	3	cuckoo	host nest	cuckoo	6.5	4	6.5	800	0	1	1	0	1	1	4
Andrena subopaca NYLANDER, 1848	1	2	2	polylectic	ground	solitary	5.5	6	7	1050	1	1	1	1	1	1	6
Andrena viridescens VIERECK, 1916	2	3	3	oligolectic	ground	solitary	5	3	7	800	0	1	1	1	1	1	5
Anthidium nanum MOCSÁRY, 1879	3	4	3	oligolectic	above	solitary	7.5	4	7	800	0	0	0	0	1	1	2
Ceratina cucurbitina (ROSSI, 1792)	1	3	2	polylectic	above	solitary	7	5	7	800	0	1	1	0	1	1	4
Coelioxys echinata FÖRSTER, 1853	1	4	1	cuckoo	host nest	cuckoo	7.5	2	7	800	0	1	0	0	1	1	3
Epeolus cruciger (PANZER, 1799)	3	3	4	cuckoo	host nest	cuckoo	7.5	2	7	400	0	1	0	0	1	1	3
Halictus confusus SMITH, 1853	1	3	2	polylectic	ground	solitary	5.5	7	7	1050	0	1	0	0	0	1	2
Halictus tumulorum (LINNAEUS, 1758)	1	1	2	polylectic	ground	social	6.5	6	7	1050	1	1	1	1	1	1	6
Hylaeus annulatus (LINNAEUS, 1758)	unknown	6	2	polylectic	above	solitary	7.5	4	7	1050	1	0	1	1	1	1	5
Hylaeus confusus NYLANDER, 1852	1	2	2	polylectic	above	solitary	6.5	6	7	1050	1	1	1	0	1	0	4
Hylaeus cornutus CURTIS, 1831	1	3	insufficient data	polylectic	above	solitary	7	3	7	800	0	1	0	1	1	1	4
Hylaeus duckei (ALFKEN, 1904)	3	4	3	polylectic	above	solitary	6.5	4	7	800	0	1	0	0	0	1	2
Hylaeus gibbus SAUNDERS, 1850	1	2	2	polylectic	above	solitary	7	5	7	1050	0	1	0	0	1	1	3
Hylaeus pectoralis FÖRSTER, 1871	3	3	4	polylectic	above	solitary	7	5	7	400	1	0	0	1	1	0	2
Hylaeus variegatus (FABRICIUS, 1798)	2	3	3	polylectic	ground	solitary	7.5	4	7	800	0	1	0	0	0	1	2
Lasioglossum fratellum (PÉREZ, 1903)	1	3	2	polylectic	ground	solitary	7	7	7	1500	1	1	0	0	1	0	3
Lasioglossum lativentre (SCHENCK, 1853)	2	3	3	polylectic	ground	solitary	7	7	7	800	0	0	0	1	1	1	3
Lasioglossum lineare (SCHENCK, 1868)	3	3	4	polylectic	ground	social	6	7	7	800	0	1	0	0	0	1	2
Lasioglossum quadrinotatum (KIRBY, 1802)	3	4	3	polylectic	ground	solitary	7	7	7	400	0	0	0	1	0	1	2
Nomada facilis SCHWARZ, 1967	3	5	insufficient data	cuckoo	host nest	cuckoo	6.5	4	7	800	0	1	0	1	1	0	3
Nomada integra BRULLÉ, 1832	3	4	insufficient data	cuckoo	host nest	cuckoo	6	5	7	800	0	1	0	1	1	0	3
Ammobates punctatus (FABRICIUS, 1804)	4	5	3	cuckoo	host nest	cuckoo	7	3	7.5	800	0	1	0	0	0	0	1
Andrena nanaeformis NOSKIEWICZ, 1925	6	7	6	polylectic	ground	solitary	5.5	4	7.5	400	0	1	0	0	0	0	1
Biastes brevicornis (PANZER, 1798)	5	6	3	cuckoo	host nest	cuckoo	7	3	7.5	400	0	0	0	0	0	1	1
Dufourea dentiventris (NYLANDER, 1848)	3	3	4	oligolectic	ground	solitary	7.5	2	7.5	1050	0	0	0	0	1	1	2
Dufourea inermis (NYLANDER, 1848)	4	4	4	oligolectic	ground	solitary	7.5	2	7.5	1500	0	0	0	0	1	1	2
Epeolus variegatus (LINNAEUS, 1758)	2	3	3	cuckoo	host nest	cuckoo	7	3	7.5	800	0	1	0	0	0	1	2
Halictus leucaheneus EBMER, 1972	3	3	4	polylectic	ground	social	6.5	6	7.5	800	1	1	0	0	0	1	3
Halictus subauratus (ROSSI, 1792)	1	3	2	polylectic	ground	social	5.5	6	7.5	800	0	1	0	0	0	1	2
Hylaeus difformis (EVERSMANN, 1852)	1	4	2	polylectic	above	solitary	7	3	7.5	800	1	0	0	1	1	0	3
Hylaeus punctulatissimus SMITH, 1842	3	3	insufficient data	oligolectic	above	solitary	6.5	4	7.5	800	0	1	1	0	0	1	3
Lasioglossum quadrinotatulum (SCHENCK, 1861)	3	4	3	polylectic	ground	solitary	7	7	7.5	400	0	1	0	1	0	1	3
Nomada baccata SMITH, 1844	4	4	4	cuckoo	host nest	cuckoo	8	3	7.5	400	0	1	0	0	0	0	1
Nomada guttulata SCHENCK, 1861	1	4	2	cuckoo	host nest	cuckoo	5.5	4	7.5	800	0	0	1	1	1	1	4
Osmia gallarum SPINOLA, 1808	2	4	3	oligolectic	above	solitary	6	5	7.5	800	0	0	0	0	1	1	2
Osmia spinulosa (KIRBY, 1802)	3	3	4	oligolectic	above	solitary	7	5	7.5	1050	0	1	0	1	1	0	3
Osmia submicans MORAWITZ, 1870	4	5	3	polylectic	above	solitary	5.5	2	7.5	800	0	1	0	0	1	1	3
Rhophitoides canus (EVERSMANN, 1852)	2	4	3	oligolectic	ground	solitary	7	3	7.5	400	0	0	0	0	0	1	1
Sphecodes ephippius (LINNAEUS, 1767)	1	1	2	cuckoo	host nest	cuckoo	6.5	8	7.5	1050	1	1	1	1	1	1	6
Sphecodes ferruginatus VON HAGENS, 1882	1	3	2	cuckoo	host nest	cuckoo	7	7	7.5	1500	1	1	1	1	1	1	6
Sphecodes rufiventris (PANZER, 1798)	1	3	2	cuckoo	host nest	cuckoo	6.5	6	7.5	800	0	1	0	0	1	1	3
Andrena labiata FABRICIUS, 1781	1	2	2	polylectic	ground	solitary	5.5	4	8	1050	0	0	1	1	1	1	4
Andrena nitidiuscula SCHENCK, 1853	3	3	4	oligolectic	ground	solitary	7	3	8	800	0	1	1	1	1	1	5
Coelioxys afra LEPELETIER, 1841	3	4	3	cuckoo	host nest	cuckoo	7	3	8	800	0	1	0	0	0	1	2
Coelioxys brevis EVERSMANN, 1852	4	5	3	cuckoo	host nest	cuckoo	7	3	8	400	0	1	0	0	0	0	1
Colletes mlokossewiczi RADOSZKOWSKI, 1891	unknown	6	insufficient data	oligolectic	ground	solitary	7	3	8	400	0	1	0	0	0	1	2
Hylaeus nigritus (FABRICIUS, 1798)	1	1	2	oligolectic	above	solitary	7	5	8	1050	0	1	1	1	0	1	4
Hylaeus signatus (PANZER, 1798)	1	1	2	oligolectic	above	solitary	6.5	6	8	800	0	1	1	0	1	1	4
Lasioglossum albipes (FABRICIUS, 1781)	1	1	2	polylectic	ground	social	7	7	8	1500	1	0	1	0	1	1	4
Lasioglossum laeve (KIRBY, 1802)	5	6	4	polylectic	ground	solitary	6.5	6	8	800	0	0	0	0	1	1	2
Lasioglossum marginatum (BRULLÉ, 1832)	unknown	6	2	polylectic	ground	social	6.5	8	8	800	0	0	0	1	0	1	2
Lasioglossum prasinum (SMITH, 1848)	4	4	4	polylectic	ground	solitary	7	7	8	400	0	1	0	0	0	0	1
Nomada alboguttata HERRICH-SCHÄFFER, 1839	1	3	2	cuckoo	host nest	cuckoo	4.5	2	8	400	0	1	0	0	0	0	1
Nomada argentata HERRICH-SCHÄFFER, 1839	4	4	4	cuckoo	host nest	cuckoo	8	3	8	800	0	1	0	0	0	1	2
Nomada obscura ZETTERSTEDT, 1838	1	4	2	cuckoo	host nest	cuckoo	4.5	4	8	1050	1	1	0	0	1	0	3
Nomada opaca ALFKEN, 1913	4	5	3	cuckoo	host nest	cuckoo	5.5	2	8	400	1	0	0	0	1	0	2
Nomada piccioliana MAGRETTI, 1883	3	4	3	cuckoo	host nest	cuckoo	6	3	8	800	0	0	0	1	0	1	2
Nomada rhenana MORAWITZ, 1872	3	4	insufficient data	cuckoo	host nest	cuckoo	6	5	8	400	0	1	1	1	1	1	5
Nomada roberjeotiana PANZER, 1799	3	4	insufficient data	cuckoo	host nest	cuckoo	8	3	8	800	0	1	0	0	0	0	1
Nomada rufipes FABRICIUS, 1793	2	3	3	cuckoo	host nest	cuckoo	8	3	8	1050	0	1	0	0	1	0	2
Nomada zonata PANZER, 1798	2	4	2	cuckoo	host nest	cuckoo	6	5	8	400	0	1	0	0	1	1	3
Osmia leucomelana (KIRBY, 1802)	1	2	2	polylectic	above	solitary	7	3	8	1050	0	1	0	0	1	1	3
Panurgus calcaratus (SCOPOLI, 1763)	1	3	2	oligolectic	ground	solitary	7.5	4	8	1050	0	1	0	0	1	1	3
Panurgus dentipes LATREILLE, 1811	3	4	3	oligolectic	ground	solitary	7.5	4	8	800	0	0	0	0	0	1	1
Sphecodes cristatus VON HAGENS, 1882	3	4	insufficient data	cuckoo	host nest	cuckoo	6.5	2	8	800	0	1	0	0	0	1	2
Stelis phaeoptera (KIRBY, 1802)	3	4	3	cuckoo	host nest	cuckoo	6.5	6	8	1050	0	0	0	1	1	1	3
Andrena coitana (KIRBY, 1802)	3	4	3	polylectic	ground	solitary	7.5	4	8.5	1050	1	0	0	0	1	0	2
Andrena pallitarsis PÉREZ, 1903	5	6	4	oligolectic	ground	solitary	7.5	2	8.5	400	0	0	0	0	0	1	1
Andrena ventralis IMHOFF, 1832	1	3	2	oligolectic	ground	solitary	4	3	8.5	800	0	1	0	0	0	0	1
Anthidium punctatum LATREILLE, 1809	2	3	3	polylectic	above	solitary	7	5	8.5	1050	0	0	1	0	1	1	3
Anthophora bimaculata (PANZER, 1798)	3	4	3	polylectic	ground	solitary	7	5	8.5	800	0	1	0	0	0	0	1
Anthophora pubescens (FABRICIUS, 1781)	5	6	4	polylectic	ground	solitary	7	3	8.5	800	0	0	1	1	0	0	2
Eucera alticincta (LEPELETIER, 1841)	6	7	6	oligolectic	ground	solitary	8	3	8.5	400	0	1	0	0	1	0	2
Lasioglossum calceatum (SCOPOLI, 1763)	1	1	2	polylectic	ground	social	6.5	8	8.5	1050	1	1	1	1	1	1	6
Lasioglossum laevigatum (KIRBY, 1802)	3	3	4	polylectic	ground	solitary	6.5	8	8.5	1050	0	1	0	1	1	1	4
Lasioglossum malachurum (KIRBY, 1802)	1	2	2	polylectic	ground	social	7	7	8.5	800	1	1	1	1	1	1	6
Megachile apicalis SPINOLA, 1808	4	5	3	polylectic	ground and above	solitary	7	3	8.5	800	0	0	0	1	1	0	2
Megachile rotundata (FABRICIUS, 1787)	1	3	2	polylectic	ground and above	solitary	7.5	4	8.5	800	0	1	0	0	1	1	3
Nomada conjungens HERRICH-SCHÄFFER, 1839	1	3	2	cuckoo	host nest	cuckoo	5.5	4	8.5	800	0	0	1	1	1	1	4
Nomada similis MORAWITZ, 1872	3	4	insufficient data	cuckoo	host nest	cuckoo	7.5	4	8.5	1050	1	1	0	0	1	1	4
Osmia parietina CURTIS, 1828	3	4	3	polylectic	above	solitary	6	5	8.5	1050	1	0	0	0	1	0	2
Osmia rufohirta LATREILLE, 1811	3	3	4	polylectic	above	solitary	6	5	8.5	800	0	1	0	0	0	1	2
Pseudapis femoralis (PALLAS, 1773)	6	7	6	polylectic	ground	solitary	6.5	2	8.5	400	0	1	0	0	0	1	2
Sphecodes majalis PÉREZ, 1903	1	5	2	cuckoo	host nest	cuckoo	4.5	2	8.5	400	0	0	0	1	1	1	3
Sphecodes monilicornis (KIRBY, 1802)	1	1	2	cuckoo	host nest	cuckoo	6.5	8	8.5	800	1	1	1	1	1	1	6
Sphecodes reticulatus THOMSON, 1870	1	3	2	cuckoo	host nest	cuckoo	7	7	8.5	800	0	1	0	0	1	1	3
Stelis nasuta (LATREILLE, 1809)	6	7	6	cuckoo	host nest	cuckoo	6.5	4	8.5	800	0	1	0	0	0	1	2
Systropha curvicornis (SCOPOLI, 1770)	3	4	3	oligolectic	ground	solitary	7	3	8.5	400	0	0	0	0	0	1	1
Andrena argentata SMITH, 1844	3	3	4	polylectic	ground	solitary	6.5	5	9	400	0	1	0	0	0	0	1
Andrena paucisquama NOSKIEWICZ, 1924	5	6	insufficient data	oligolectic	ground	solitary	5.5	2	9	400	0	0	0	1	1	1	3
Anthidium oblongatum (ILLIGER, 1806)	2	3	3	polylectic	above	solitary	7	3	9	800	0	0	1	0	1	1	3
Ceratina chalybea CHEVRIER, 1872	3	4	3	polylectic	above	solitary	6.5	6	9	400	0	0	0	0	0	1	1
Osmia rapunculi (LEPELETIER, 1841)	1	2	2	oligolectic	above	solitary	6.5	4	9	1050	0	0	1	1	1	1	4
Colletes daviesanus SMITH, 1846	1	2	2	oligolectic	ground	solitary	7.5	4	9	1050	0	1	1	0	0	1	3
Colletes marginatus SMITH, 1846	3	4	3	polylectic	ground	solitary	8	3	9	800	0	1	0	0	0	1	2
Epeoloides coecutiens (FABRICIUS, 1775)	1	4	2	cuckoo	host nest	cuckoo	7.5	2	9	800	1	0	0	0	1	0	2
Eucera salicariae (LEPELETIER, 1841)	3	4	3	polylectic	ground	solitary	7	3	9	400	0	1	0	0	1	0	2
Halictus maculatus SMITH, 1848	1	2	2	polylectic	ground	social	6.5	6	9	800	0	1	0	0	1	1	3
Lasioglossum leucozonium (SCHRANK, 1781)	1	1	2	polylectic	ground	solitary	7	7	9	1050	1	1	1	1	1	1	6
Lasioglossum sexmaculatum (SCHENCK, 1853)	3	5	insufficient data	polylectic	ground	solitary	5.5	6	9	400	0	1	0	0	0	0	1
Nomada fabriciana (LINNAEUS, 1767)	1	1	2	cuckoo	host nest	cuckoo	5.5	6	9	1050	1	1	1	1	1	1	6
Nomada femoralis MORAWITZ, 1869	4	5	3	cuckoo	host nest	cuckoo	5.5	4	9	800	0	1	0	1	1	1	4
Nomada ferruginata (LINNAEUS, 1767)	1	3	2	cuckoo	host nest	cuckoo	4	3	9	800	0	1	0	0	1	0	2
Nomada fucata PANZER, 1798	1	2	2	cuckoo	host nest	cuckoo	5.5	6	9	800	1	1	1	1	1	1	6
Osmia caerulescens (LINNAEUS, 1758)	1	2	2	polylectic	above	solitary	6.5	8	9	800	0	1	1	0	1	1	4
Osmia claviventris THOMSON, 1872	1	2	2	polylectic	above	solitary	7	3	9	1050	0	1	0	0	1	1	3
Osmia ravouxi PÉREZ, 1902	4	4	4	polylectic	above	solitary	6	5	9	800	0	1	0	0	0	1	2
Sphecodes pellucidus SMITH, 1845	2	3	3	cuckoo	host nest	cuckoo	6.5	6	9	1050	0	1	0	0	1	1	3
Sphecodes scabricollis WESMAEL, 1835	3	4	insufficient data	cuckoo	host nest	cuckoo	7	5	9	800	1	1	1	1	1	1	6
Thyreus orbatus (LEPELETIER, 1841)	4	5	3	cuckoo	host nest	cuckoo	7	5	9	1050	0	1	0	1	0	0	2
Andrena bicolor FABRICIUS, 1775	1	1	2	polylectic	ground	solitary	5.5	6	9.5	1050	1	1	1	1	1	1	6
Andrena chrysopus PÉREZ, 1903	2	4	2	oligolectic	ground	solitary	5.5	2	9.5	400	0	1	0	0	0	0	1
Andrena chrysosceles (KIRBY, 1802)	1	2	2	polylectic	ground	solitary	5	3	9.5	400	0	0	1	1	1	1	4
Andrena dorsata (KIRBY, 1802)	1	2	2	polylectic	ground	solitary	6	5	9.5	800	0	1	0	0	1	1	3
Andrena marginata FABRICIUS, 1776	4	4	4	oligolectic	ground	solitary	8	3	9.5	800	0	1	0	0	0	1	2
Andrena ovatula (KIRBY, 1802)	1	2	2	polylectic	ground	solitary	5.5	6	9.5	1050	0	1	1	1	1	1	5
Andrena ruficrus NYLANDER, 1848	3	4	insufficient data	oligolectic	ground	solitary	4	3	9.5	1050	1	1	0	0	1	0	3
Andrena symphyti SCHMIEDEKNECHT, 1883	1	5	insufficient data	oligolectic	ground	solitary	5	3	9.5	400	0	1	0	0	1	0	2
Anthidium byssinum (PANZER, 1798)	3	3	4	oligolectic	ground	solitary	7	3	9.5	1050	0	1	0	1	1	0	3
Coelioxys inermis (KIRBY, 1802)	1	3	2	cuckoo	host nest	cuckoo	7.5	6	9.5	800	0	0	1	1	1	1	4
Colletes impunctatus NYLANDER, 1852	3	5	3	polylectic	ground	solitary	7	3	9.5	1050	0	1	0	0	0	0	1
Epeolus schummeli SCHILLING, 1849	5	6	3	cuckoo	host nest	cuckoo	7	3	9.5	400	0	1	0	0	0	0	1
Halictus eurygnathus BLÜTHGEN, 1931	1	3	2	polylectic	ground	solitary	6.5	6	9.5	800	0	1	0	0	0	1	2
Halictus simplex BLÜTHGEN, 1923	1	2	2	polylectic	ground	solitary	6	5	9.5	1050	0	1	0	0	0	1	2
Lasioglossum euboeense (STRAND, 1909)	4	5	3	polylectic	ground	social	7	7	9.5	800	0	1	0	0	0	1	2
Lasioglossum nigripes (LEPELETIER, 1841)	4	4	4	polylectic	ground	social	7	7	9.5	1050	1	1	1	1	1	1	6
Lasioglossum subfasciatum (IMHOFF, 1832)	5	5	4	polylectic	ground	solitary	6.5	8	9.5	800	0	0	0	0	0	1	1
Lasioglossum zonulum (SMITH, 1848)	1	2	2	polylectic	ground	solitary	7	7	9.5	800	1	1	1	1	1	1	6
Megachile leachella CURTIS, 1828	3	4	3	polylectic	ground and above	solitary	7	5	9.5	800	0	1	0	0	0	0	1
Megachile pilidens ALFKEN, 1924	3	4	4	polylectic	ground and above	solitary	7	5	9.5	800	0	1	0	0	0	1	2
Nomada flavopicta (KIRBY, 1802)	1	3	2	cuckoo	host nest	cuckoo	7.5	6	9.5	400	1	1	1	1	1	1	6
Nomada hirtipes PÉREZ, 1884	3	4	3	cuckoo	host nest	cuckoo	5	3	9.5	800	0	0	0	1	1	0	2
Nomada moeschleri ALFKEN, 1913	1	5	2	cuckoo	host nest	cuckoo	6	3	9.5	800	0	0	1	1	1	0	3
Osmia acuticornis DUFOUR & PERRIS, 1840	4	5	3	polylectic	above	solitary	7	3	9.5	800	0	1	0	0	0	1	2
Osmia anthocopoides SCHENCK, 1853	3	3	4	oligolectic	above	solitary	6.5	4	9.5	1050	0	1	0	0	0	0	1
Osmia inermis (ZETTERSTEDT, 1838)	4	5	4	polylectic	above	solitary	6.5	4	9.5	1900	0	1	0	0	0	0	1
Osmia leaiana (KIRBY, 1802)	3	4	3	oligolectic	above	solitary	6	5	9.5	1050	0	0	0	1	1	1	3
Osmia niveata (FABRICIUS, 1804)	3	3	4	oligolectic	above	solitary	5.5	4	9.5	800	0	0	1	1	1	1	4
Osmia uncinata GERSTÄCKER, 1869	3	4	3	polylectic	above	solitary	5.5	6	9.5	1050	1	0	0	0	1	0	2
Rophites algirus PÉREZ, 1895	3	4	3	oligolectic	ground	solitary	6.5	2	9.5	800	0	1	0	0	0	1	2
Rophites quinquespinosus SPINOLA, 1808	4	5	3	oligolectic	ground	solitary	7	3	9.5	400	0	1	0	0	1	1	3
Sphecodes rubicundus VON HAGENS, 1875	3	4	3	cuckoo	host nest	cuckoo	6	3	9.5	400	0	0	0	1	1	0	2
Sphecodes ruficrus (ERICHSON, 1835)	1	5	2	cuckoo	host nest	cuckoo	5	3	9.5	400	0	1	0	0	0	1	2
Stelis punctulatissima (KIRBY, 1802)	1	2	2	cuckoo	host nest	cuckoo	7	5	9.5	800	0	1	1	0	1	1	4
Andrena angustior (KIRBY, 1802)	1	3	2	polylectic	ground	solitary	8	3	10	400	0	1	0	1	1	0	3
Andrena proxima (KIRBY, 1802)	1	3	2	oligolectic	ground	solitary	5	3	10	1050	0	0	1	1	1	1	4
Colletes fodiens (GEOFFROY, 1785)	3	4	3	oligolectic	ground	solitary	7.5	2	10	800	0	1	0	0	0	1	2
Colletes similis SCHENCK, 1853	2	3	3	oligolectic	ground	solitary	7.5	4	10	800	0	1	0	1	0	1	3
Dufourea paradoxa (MORAWITZ, 1867)	unknown	6	2	polylectic	ground	solitary	7.5	4	10	1900	0	1	0	0	0	0	1
Eucera cineraria EVERSMANN, 1852	6	7	6	oligolectic	ground	solitary	6	3	10	400	0	1	0	0	0	1	2
Lasioglossum costulatum (KRIECHBAUMER, 1873)	3	3	4	oligolectic	ground	solitary	6.5	6	10	1050	0	1	0	1	1	1	4
Nomada braunsiana SCHMIEDEKNECHT, 1882	5	6	insufficient data	cuckoo	host nest	cuckoo	6.5	4	10	1050	0	0	0	1	1	1	3
Nomada leucophthalma (KIRBY, 1802)	1	2	2	cuckoo	host nest	cuckoo	4.5	4	10	1050	1	1	0	0	1	0	3
Nomada mutabilis MORAWITZ, 1870	5	6	4	cuckoo	host nest	cuckoo	6	3	10	800	0	1	0	1	0	0	2
Nomada pleurosticta HERRICH-SCHÄFFER, 1839	4	5	3	cuckoo	host nest	cuckoo	7	3	10	400	0	1	0	1	1	1	4
Nomada ruficornis (LINNAEUS, 1758)	1	2	2	cuckoo	host nest	cuckoo	4.5	4	10	800	0	0	1	1	1	0	3
Nomada striata FABRICIUS, 1793	1	2	2	cuckoo	host nest	cuckoo	6	5	10	1050	0	1	0	1	1	0	3
Nomada symphyti STÖCKHERT, 1930	3	5	3	cuckoo	host nest	cuckoo	5.5	2	10	400	1	1	0	0	1	0	3
Osmia bicornis (LINNAEUS, 1758)	1	1	2	polylectic	above	solitary	5	5	10	800	1	1	1	1	1	1	6
Osmia loti MORAWITZ, 1867	unknown	6	2	polylectic	above	solitary	7.5	4	10	1500	0	1	0	0	0	0	1
Osmia pilicornis SMITH, 1846	3	5	insufficient data	polylectic	above	solitary	4.5	4	10	800	1	0	0	0	1	0	2
Sphecodes gibbus (LINNAEUS, 1758)	1	1	2	cuckoo	host nest	cuckoo	7	7	10	1500	1	1	1	1	1	1	6
Sphecodes schenckii VON HAGENS, 1882	5	6	insufficient data	cuckoo	host nest	cuckoo	6.5	6	10	400	0	1	0	0	0	1	2
Stelis franconica BLÜTHGEN, 1930	6	7	6	cuckoo	host nest	cuckoo	6	3	10	1200	0	1	0	0	0	1	2
Andrena combinata (CHRIST, 1791)	3	4	3	polylectic	ground	solitary	5.5	2	10.5	800	0	0	0	1	0	1	2
Andrena hypopolia SCHMIEDEKNECHT, 1883	4	6	4	polylectic	ground	solitary	6.5	4	10.5	400	0	1	0	0	0	0	1
Andrena lagopus (LATREILLE, 1809)	1	3	2	oligolectic	ground	solitary	5	3	10.5	800	0	1	0	1	1	1	4
Andrena praecox (SCOPOLI, 1763)	1	3	2	oligolectic	ground	solitary	4	3	10.5	800	0	1	0	0	1	0	2
Andrena simillima SMITH, 1851	5	6	3	polylectic	ground	solitary	8	3	10.5	1500	0	1	0	0	0	0	1
Bombus pyrenaeus PÉREZ, 1879	1	4	2	polylectic	ground and above	social	7	5	10.5	2300	1	0	0	0	1	0	2
Coelioxys lanceolata NYLANDER, 1852	4	6	3	cuckoo	host nest	cuckoo	6.5	2	10.5	950	1	0	0	0	1	0	2
Coelioxys mandibularis NYLANDER, 1848	1	3	2	cuckoo	host nest	cuckoo	7	3	10.5	1050	0	1	1	1	1	1	5
Colletes hylaeiformis EVERSMANN, 1852	5	6	insufficient data	oligolectic	ground	solitary	8	3	10.5	400	0	1	0	0	0	1	2
Halictus rubicundus (CHRIST, 1791)	1	3	2	polylectic	ground	social	6.5	6	10.5	1050	1	1	1	1	1	1	6
Lasioglossum sexnotatum (KIRBY, 1802)	3	4	4	polylectic	ground	solitary	7	7	10.5	400	0	1	0	0	0	1	2
Nomada emarginata MORAWITZ, 1877	1	4	2	cuckoo	host nest	cuckoo	7	5	10.5	800	0	0	0	1	1	1	3
Nomada panzeri LEPELETIER, 1841	1	2	2	cuckoo	host nest	cuckoo	5.5	6	10.5	1050	1	1	1	1	1	1	6
Osmia aurulenta (PANZER, 1799)	1	3	2	polylectic	above	solitary	5	5	10.5	800	0	1	0	1	1	1	4
Osmia bicolor (SCHRANK, 1781)	1	3	2	polylectic	above	solitary	5	5	10.5	800	1	1	0	0	1	1	4
Osmia papaveris (LATREILLE, 1799)	5	5	4	polylectic	ground	solitary	6	3	10.5	800	0	0	0	0	1	1	2
Sphecodes spinulosus VON HAGENS, 1875	3	4	insufficient data	cuckoo	host nest	cuckoo	6	3	10.5	800	0	0	0	1	1	1	3
Systropha planidens GIRAUD, 1861	4	4	4	oligolectic	ground	solitary	7	3	10.5	400	0	0	0	0	0	1	1
Thyreus histrionicus (ILLIGER, 1806)	6	7	6	cuckoo	host nest	cuckoo	7.5	2	10.5	800	0	1	0	0	0	0	1
Andrena denticulata (KIRBY, 1802)	2	3	3	oligolectic	ground	solitary	7.5	2	11	800	1	1	0	0	1	1	4
Andrena haemorrhoa (FABRICIUS, 1781)	1	1	2	polylectic	ground	solitary	4.5	4	11	800	1	1	1	1	1	1	6
Andrena humilis IMHOFF, 1832	2	3	3	oligolectic	ground	solitary	6	3	11	1050	1	1	0	1	1	1	5
Andrena pandellei PÉREZ, 1895	3	3	4	oligolectic	ground	solitary	5.5	2	11	800	0	0	0	1	1	1	3
Andrena sericata IMHOFF, 1868	unknown	6	2	oligolectic	ground	solitary	4	3	11	800	0	0	0	0	1	0	1
Andrena similis SMITH, 1849	3	4	insufficient data	oligolectic	ground	solitary	5	5	11	400	0	1	0	1	1	0	3
Andrena synadelpha PERKINS, 1914	1	4	2	polylectic	ground	solitary	6	3	11	400	1	1	0	0	1	1	4
Andrena taraxaci GIRAUD, 1861	unknown	6	2	oligolectic	ground	solitary	4.5	4	11	800	0	1	0	1	1	1	4
Andrena varians (KIRBY, 1802)	1	3	2	polylectic	ground	solitary	4	3	11	800	1	0	1	1	1	1	5
Anthophora quadrimaculata (PANZER, 1798)	2	3	3	polylectic	ground	solitary	6.5	4	11	1050	0	1	1	1	0	0	3
Colletes floralis EVERSMANN, 1852	6	7	6	polylectic	ground	solitary	6.5	4	11	1050	0	1	0	0	0	0	1
Colletes halophilus VERHOEFF, 1944	unknown	6	2	oligolectic	ground	solitary	9	3	11	0	0	1	0	0	0	0	1
Colletes succinctus (LINNAEUS, 1758)	2	3	3	oligolectic	ground	solitary	8.5	2	11	400	0	1	0	0	1	0	2
Nomada armata HERRICH-SCHÄFFER, 1839	3	3	4	cuckoo	host nest	cuckoo	6.5	4	11	800	0	0	0	1	1	0	2
Nomada bifasciata OLIVIER, 1811	1	2	2	cuckoo	host nest	cuckoo	4.5	4	11	400	1	1	1	1	1	1	6
Nomada lathburiana (KIRBY, 1802)	1	2	2	cuckoo	host nest	cuckoo	5.5	6	11	1050	0	1	1	1	1	1	5
Nomada mutica MORAWITZ, 1872	4	5	3	cuckoo	host nest	cuckoo	5.5	4	11	800	1	1	0	0	1	1	4
Nomada stigma FABRICIUS, 1804	1	2	2	cuckoo	host nest	cuckoo	6	5	11	800	0	0	0	1	1	0	2
Nomada villosa THOMSON, 1870	3	4	insufficient data	cuckoo	host nest	cuckoo	5.5	4	11	800	0	0	1	1	1	0	3
Osmia brevicornis (FABRICIUS, 1798)	3	4	insufficient data	oligolectic	above	solitary	5.5	4	11	800	0	0	1	0	1	1	3
Osmia cerinthidis MORAWITZ, 1876	5	6	3	oligolectic	above	solitary	5.5	2	11	800	0	0	0	0	1	1	2
Osmia maritima FRIESE, 1885	unknown	6	2	polylectic	ground	solitary	6	3	11	0	0	1	0	0	0	0	1
Osmia tridentata DUFOUR & PERRIS, 1840	3	4	3	oligolectic	above	solitary	7	3	11	400	0	0	0	0	1	1	2
Osmia villosa (SCHENCK, 1853)	4	5	3	oligolectic	above	solitary	6	3	11	1500	0	1	0	0	0	0	1
Panurgus banksianus (KIRBY, 1802)	1	3	2	oligolectic	ground	solitary	7	3	11	1050	1	1	0	1	1	1	5
Ammobatoides abdominalis (EVERSMANN, 1852)	6	7	6	cuckoo	host nest	cuckoo	7	3	11.5	400	0	1	0	1	0	1	3
Andrena barbilabris (KIRBY, 1802)	2	3	3	polylectic	ground	solitary	5	5	11.5	400	0	1	0	0	1	1	3
Andrena florea FABRICIUS, 1793	1	3	2	oligolectic	ground	solitary	6.5	4	11.5	800	0	0	1	0	1	1	3
Andrena fucata SMITH, 1847	1	3	2	polylectic	ground	solitary	6	3	11.5	1050	1	0	0	0	0	0	1
Andrena mitis SCHMIEDEKNECHT, 1883	2	3	3	oligolectic	ground	solitary	4.5	4	11.5	400	1	1	0	1	0	0	3
Andrena nigriceps (KIRBY, 1802)	4	5	3	polylectic	ground	solitary	7	3	11.5	800	0	1	0	0	0	1	2
Andrena schencki MORAWITZ, 1866	4	6	4	polylectic	ground	solitary	6	3	11.5	400	0	0	0	1	0	1	2
Andrena wilkella (KIRBY, 1802)	1	3	2	oligolectic	ground	solitary	5	5	11.5	1050	0	1	0	1	1	1	4
Anthidium manicatum (LINNAEUS, 1758)	1	2	2	polylectic	above	solitary	7	3	11.5	800	0	1	1	0	1	0	3
Anthophora furcata (PANZER, 1798)	2	3	3	oligolectic	above	solitary	7	3	11.5	800	1	0	1	0	1	0	3
Bombus jonellus (KIRBY, 1802)	3	4	3	polylectic	ground and above	social	6	7	11.5	1050	1	1	0	0	1	1	4
Bombus pratorum (LINNAEUS, 1761)	1	1	2	polylectic	above	social	5	5	11.5	1500	1	0	1	1	1	1	5
Coelioxys aurolimbata FÖRSTER, 1853	2	3	3	cuckoo	host nest	cuckoo	7	3	11.5	400	0	1	0	1	1	1	4
Coelioxys conica (LINNAEUS, 1758)	2	3	3	cuckoo	host nest	cuckoo	6.5	4	11.5	1050	0	0	0	1	1	0	2
Coelioxys elongata LEPELETIER, 1841	1	4	insufficient data	cuckoo	host nest	cuckoo	7	5	11.5	800	0	1	0	1	1	1	4
Colletes hederae SCHMIDT & WESTRICH, 1993	1	3	insufficient data	oligolectic	ground	solitary	9	3	11.5	400	1	1	1	1	1	1	6
Eucera macroglossa ILLIGER, 1806	4	5	3	oligolectic	ground	solitary	7	3	11.5	800	0	1	0	0	0	1	2
Lasioglossum majus (NYLANDER, 1852)	3	4	4	polylectic	ground	solitary	6.5	6	11.5	800	1	0	0	1	1	1	4
Megachile analis NYLANDER, 1852	4	5	3	polylectic	ground	solitary	7	5	11.5	1500	0	1	0	0	0	0	1
Megachile melanopyga COSTA, 1863	5	6	4	polylectic	above	solitary	7.5	6	11.5	800	0	1	0	1	0	1	3
Megachile versicolor SMITH, 1844	1	2	2	polylectic	above	solitary	7	5	11.5	800	1	1	1	1	1	1	6
Melitta leporina (PANZER, 1799)	1	3	2	oligolectic	ground	solitary	7.5	4	11.5	400	0	0	1	1	0	1	3
Melitta nigricans ALFKEN, 1905	1	3	2	oligolectic	ground	solitary	7.5	2	11.5	400	0	0	0	0	1	0	1
Melitta tricincta KIRBY, 1802	2	3	2	oligolectic	ground	solitary	8.5	2	11.5	800	0	1	0	1	0	1	3
Nomada fulvicornis FABRICIUS, 1793	1	2	2	cuckoo	host nest	cuckoo	5.5	6	11.5	800	1	1	1	1	1	1	6
Nomada goodeniana (KIRBY, 1802)	1	1	2	cuckoo	host nest	cuckoo	5.5	3	11.5	800	1	1	1	1	1	1	6
Nomada marshamella (KIRBY, 1802)	1	1	2	cuckoo	host nest	cuckoo	5.5	4	11.5	800	1	1	1	1	1	1	6
Nomada signata JURINE, 1807	1	4	2	cuckoo	host nest	cuckoo	4.5	4	11.5	800	1	0	1	0	1	0	3
Nomada succincta PANZER, 1798	1	2	2	cuckoo	host nest	cuckoo	4.5	4	11.5	800	1	1	1	1	1	1	6
Osmia tuberculata NYLANDER, 1848	3	4	3	polylectic	above	solitary	6.5	2	11.5	1900	1	0	0	1	1	0	3
Andrena flavipes PANZER, 1799	1	2	2	polylectic	ground	solitary	6	7	12	800	1	1	1	1	1	1	6
Andrena tscheki MORAWITZ, 1872	3	4	3	oligolectic	ground	solitary	4	3	12	400	0	0	0	1	0	1	2
Bombus humilis ILLIGER, 1806	3	3	4	polylectic	above	social	7	7	12	1050	0	0	0	1	1	1	3
Bombus pascuorum (SCOPOLI, 1763)	1	1	2	polylectic	ground and above	social	7	7	12	1050	0	0	1	1	1	1	4
Bombus soroeensis (FABRICIUS, 1776)	2	3	3	polylectic	ground	social	6.5	6	12	1050	1	1	0	1	1	1	5
Coelioxys alata FÖRSTER, 1853	5	6	insufficient data	cuckoo	host nest	cuckoo	7	3	12	400	1	0	0	0	1	0	2
Coelioxys rufescens LEPELETIER & SERVILLE, 1825	2	4	3	cuckoo	host nest	cuckoo	7.5	4	12	1050	0	0	0	0	1	0	1
Lasioglossum xanthopus (KIRBY, 1802)	1	3	2	polylectic	ground	solitary	6.5	8	12	800	0	0	0	1	1	1	3
Megachile lapponica THOMSON, 1872	1	3	2	oligolectic	above	solitary	7	3	12	800	1	0	1	0	1	0	3
Megachile pyrenaea PÉREZ, 1890	3	5	3	polylectic	ground and above	solitary	8	3	12	800	0	1	0	0	0	1	2
Nomada flava PANZER, 1798	1	1	2	cuckoo	host nest	cuckoo	4.5	4	12	800	1	1	1	1	1	1	6
Nomada nobilis HERRICH-SCHÄFFER, 1839	6	7	6	cuckoo	host nest	cuckoo	5.5	2	12	800	0	0	0	0	0	1	1
Nomada sexfasciata PANZER, 1799	1	3	2	cuckoo	host nest	cuckoo	5	3	12	800	0	0	0	1	1	1	3
Osmia adunca (PANZER, 1798)	1	2	2	oligolectic	above	solitary	7.5	4	12	800	0	1	0	0	0	1	2
Osmia lepeletieri PÉREZ, 1879	6	7	6	oligolectic	above	solitary	7	3	12	1050	0	1	0	0	0	0	1
Andrena bucephala STEPHENS, 1846	3	4	3	polylectic	ground	solitary	4.5	2	12.5	800	0	0	0	1	1	0	2
Andrena clarkella (KIRBY, 1802)	1	3	2	oligolectic	ground	solitary	4	3	12.5	1050	1	0	0	0	1	0	2
Andrena ferox SMITH, 1847	4	5	3	polylectic	ground	solitary	5.5	2	12.5	800	1	0	0	0	1	0	2
Andrena lapponica ZETTERSTEDT, 1838	2	3	3	oligolectic	ground	solitary	5.5	4	12.5	1650	1	1	0	0	1	0	3
Andrena rosae PANZER, 1801	3	4	4	polylectic	ground	solitary	5.5	5	12.5	800	0	0	0	1	1	1	3
Bombus lucorum (LINNAEUS, 1761)	1	1	2	polylectic	ground	social	5.5	6	12.5	1050	1	1	1	1	1	1	6
Bombus monticola SMITH, 1849	1	4	2	polylectic	ground	social	6	7	12.5	1900	1	1	0	0	1	0	3
Bombus ruderarius (MÜLLER, 1776)	3	4	3	polylectic	above	social	6.5	6	12.5	1500	0	0	0	1	0	0	1
Bombus sylvarum (LINNAEUS, 1761)	2	3	3	polylectic	ground and above	social	7	7	12.5	1050	0	1	1	1	1	1	5
Colletes collaris DOURS, 1872	unknown	6	2	polylectic	ground	solitary	9	3	12.5	400	0	1	0	0	0	1	2
Megachile genalis MORAWITZ, 1880	4	5	3	oligolectic	above	solitary	7.5	4	12.5	800	0	1	0	0	1	1	3
Melitta haemorrhoidalis (FABRICIUS, 1775)	1	2	2	oligolectic	ground	solitary	7.5	4	12.5	1050	0	0	1	1	1	1	4
Nomada melathoracica IMHOFF, 1834	4	5	3	cuckoo	host nest	cuckoo	5.5	4	12.5	800	0	1	1	1	1	0	4
Nomada rostrata HERRICH-SCHÄFFER, 1839	5	6	3	cuckoo	host nest	cuckoo	5.5	2	12.5	400	0	1	0	0	0	0	1
Sphecodes albilabris (FABRICIUS, 1793)	1	3	2	cuckoo	host nest	cuckoo	6.5	8	12.5	800	0	1	0	0	0	1	2
Andrena chrysopyga SCHENCK, 1853	4	5	3	polylectic	ground	solitary	5	3	13	800	0	1	0	1	0	0	2
Andrena decipiens SCHENCK, 1861	4	5	4	polylectic	ground	solitary	7.5	4	13	400	0	1	0	0	0	0	1
Andrena fulva (MÜLLER, 1766)	1	2	2	polylectic	ground	solitary	4	3	13	800	1	0	1	0	1	0	3
Andrena gravida IMHOFF, 1832	1	1	2	polylectic	ground	solitary	4.5	4	13	800	1	1	1	1	1	1	6
Andrena nuptialis PÉREZ, 1902	5	6	3	polylectic	ground	solitary	6	4	13	900	0	0	0	0	1	1	2
Andrena nycthemera IMHOFF, 1868	3	4	3	oligolectic	ground	solitary	4.5	4	13	400	0	1	0	0	0	0	1
Andrena polita SMITH, 1847	4	4	4	oligolectic	ground	solitary	7	5	13	400	0	1	0	1	1	1	4
Andrena rogenhoferi MORAWITZ, 1872	unknown	6	2	polylectic	ground	solitary	6.5	4	13	1500	0	1	0	1	0	0	2
Andrena scotica PERKINS, 1916	1	3	2	polylectic	ground	solitary	5	3	13	800	0	1	1	1	1	0	4
Bombus hypnorum (LINNAEUS, 1758)	1	1	2	polylectic	above	social	5.5	6	13	1050	1	0	1	1	1	1	5
Bombus muscorum (LINNAEUS, 1758)	4	4	4	polylectic	above	social	7	5	13	800	0	1	0	1	1	0	3
Bombus pomorum (PANZER, 1805)	4	4	4	polylectic	ground	social	6	5	13	800	0	0	0	1	1	0	2
Bombus veteranus (FABRICIUS, 1793)	3	4	3	polylectic	above	social	6.5	6	13	800	0	0	0	1	1	0	2
Eucera dentata GERMAR, 1839	4	5	3	oligolectic	ground	solitary	7.5	4	13	800	0	1	0	0	0	1	2
Melecta albifrons (FORSTER, 1771)	1	1	2	cuckoo	host nest	cuckoo	5	5	13	1500	0	1	1	0	0	0	2
Melecta luctuosa (SCOPOLI, 1770)	3	4	3	cuckoo	host nest	cuckoo	5.5	4	13	800	0	1	0	0	1	0	2
Osmia nigriventris (ZETTERSTEDT, 1838)	5	6	4	polylectic	above	solitary	5.5	4	13	1650	1	0	0	0	1	0	2
Andrena apicata SMITH, 1847	3	3	insufficient data	oligolectic	ground	solitary	3.5	4	13.5	800	1	1	0	0	1	0	3
Andrena bimaculata (KIRBY, 1802)	2	3	3	polylectic	ground	solitary	5.5	6	13.5	400	0	1	0	0	0	0	1
Andrena curvungula THOMSON, 1870	3	3	4	oligolectic	ground	solitary	6	3	13.5	800	0	0	0	1	1	1	3
Andrena labialis (KIRBY, 1802)	2	3	3	oligolectic	ground	solitary	6	3	13.5	1050	0	0	0	1	1	0	2
Andrena lathyri ALFKEN, 1899	1	2	2	oligolectic	ground	solitary	5.5	4	13.5	800	0	0	1	1	1	0	3
Anthophora plagiata (ILLIGER, 1806)	4	6	4	polylectic	ground	solitary	5.5	4	13.5	1050	0	1	0	0	0	0	1
Bombus hortorum (LINNAEUS, 1761)	1	2	2	polylectic	ground and above	social	6	5	13.5	1050	0	0	1	1	1	1	4
Bombus semenoviellus SKORIKOV, 1910	1	5	insufficient data	polylectic	ground	social	6	7	13.5	400	1	1	0	1	0	1	4
Colletes cunicularius (LINNAEUS, 1761)	1	3	2	polylectic	ground	solitary	3.5	2	13.5	400	0	1	0	0	0	0	1
Colletes nasutus SMITH, 1853	4	5	3	oligolectic	ground	solitary	7	3	13.5	400	0	1	0	0	0	0	1
Halictus scabiosae (ROSSI, 1790)	1	3	2	polylectic	ground	social	6.5	6	13.5	800	0	1	0	0	1	1	3
Lithurgus chrysurus FONSCOLOMBE, 1834	5	6	insufficient data	oligolectic	above	solitary	7	3	13.5	400	1	1	0	0	0	0	2
Megachile willughbiella (KIRBY, 1802)	1	2	2	polylectic	ground and above	solitary	7	5	13.5	1050	0	0	1	1	1	0	3
Melitta dimidiata MORAWITZ, 1876	5	6	3	oligolectic	ground	solitary	5.5	4	13.5	800	0	0	0	1	0	1	2
Osmia cornuta (LATREILLE, 1805)	1	3	1	polylectic	above	solitary	4	5	13.5	800	0	1	1	0	1	0	3
Osmia mustelina GERSTÄCKER, 1869	4	5	3	polylectic	above	solitary	5.5	6	13.5	1050	0	1	0	0	0	1	2
Andrena agilissima (SCOPOLI, 1770)	3	4	3	oligolectic	ground	solitary	5.5	2	14	800	0	1	1	1	1	0	4
Andrena cineraria (LINNAEUS, 1758)	1	2	2	polylectic	ground	solitary	4	3	14	1050	0	1	1	1	1	1	5
Andrena nigroaenea (KIRBY, 1802)	1	3	2	polylectic	ground	solitary	5	5	14	1050	0	1	1	1	1	0	4
Andrena pilipes FABRICIUS, 1781	3	3	4	polylectic	ground	solitary	6.5	5	14	800	0	1	0	1	0	1	3
Andrena suerinensis FRIESE, 1884	4	5	3	oligolectic	ground	solitary	6	3	14	400	0	1	0	0	0	1	2
Andrena tibialis (KIRBY, 1802)	1	3	2	polylectic	ground	solitary	4.5	4	14	800	0	1	1	1	1	1	5
Andrena vaga PANZER, 1799	1	3	2	oligolectic	ground	solitary	4.5	4	14	800	0	1	0	0	0	0	1
Bombus lapidarius (LINNAEUS, 1758)	1	1	2	polylectic	above	social	6.5	8	14	1050	0	0	1	1	1	1	4
Bombus mesomelas GERSTÄCKER, 1869	6	7	6	polylectic	ground	social	7.5	6	14	1900	0	1	0	0	0	0	1
Bombus mucidus GERSTÄCKER, 1869	1	4	2	polylectic	ground	social	7.5	6	14	1900	0	0	0	0	1	0	1
Bombus terrestris (LINNAEUS, 1758)	1	1	2	polylectic	ground	social	5.5	8	14	800	0	0	1	1	1	1	4
Dasypoda hirtipes (FABRICIUS, 1793)	2	3	3	oligolectic	ground	solitary	7.5	4	14	800	0	1	0	0	1	1	3
Eucera longicornis (LINNAEUS, 1758)	2	3	3	oligolectic	ground	solitary	6	3	14	400	0	0	0	1	0	1	2
Eucera nigrescens PÉREZ, 1879	1	3	2	oligolectic	ground	solitary	5	3	14	400	0	0	0	1	1	0	2
Megachile ericetorum LEPELETIER, 1841	1	3	2	oligolectic	above	solitary	7	3	14	800	0	1	1	1	1	1	5
Megachile ligniseca (KIRBY, 1802)	4	5	3	polylectic	above	solitary	7.5	4	14	1050	1	0	0	0	1	0	2
Melitturga clavicornis (LATREILLE, 1806)	6	7	6	oligolectic	ground	solitary	7	3	14	800	0	1	0	1	1	1	4
Anthophora aestivalis (PANZER, 1801)	3	4	3	polylectic	ground	solitary	5.5	4	14.5	1050	0	1	0	0	1	1	3
Anthophora plumipes (PALLAS, 1772)	1	1	2	polylectic	ground	solitary	4.5	4	14.5	800	1	1	1	1	1	1	6
Anthophora retusa (LINNAEUS, 1758)	2	3	4	polylectic	ground	solitary	5.5	4	14.5	800	0	1	0	1	1	0	3
Bombus sichelii RADOSZKOWSKI, 1859	3	5	3	polylectic	ground	social	6.5	6	14.5	2300	1	0	0	0	1	0	2
Bombus wurflenii RADOSZKOWSKI, 1859	2	3	3	polylectic	ground	social	7	7	14.5	1500	1	1	0	1	1	0	4
Coelioxys conoidea (ILLIGER, 1806)	3	4	3	cuckoo	host nest	cuckoo	7	3	14.5	800	0	1	0	0	0	1	2
Halictus sexcinctus (FABRICIUS, 1775)	3	3	4	polylectic	ground	solitary	7	6	14.5	800	0	1	0	0	0	1	2
Megachile maritima (KIRBY, 1802)	3	3	4	polylectic	ground	solitary	7	3	14.5	800	0	1	0	0	0	1	2
Andrena hattorfiana (FABRICIUS, 1775)	3	3	4	oligolectic	ground	solitary	6.5	4	15	800	0	0	1	1	1	0	3
Andrena nitida (MÜLLER, 1776)	1	1	2	polylectic	ground	solitary	4.5	4	15	800	0	0	0	0	0	0	6
Andrena thoracica (FABRICIUS, 1775)	4	5	3	polylectic	ground	solitary	6.5	6	15	800	0	1	0	0	0	1	2
Bombus alpinus (LINNAEUS, 1758)	6	7	6	polylectic	ground	social	6.5	6	15	1900	0	0	0	0	0	1	1
Bombus sylvestris (LEPELETIER, 1832)	1	2	2	cuckoo	host nest	cuckoo	6	5	15	1050	1	0	1	1	1	1	5
Dasypoda argentata (PANZER, 1809)	5	6	4	oligolectic	ground	solitary	7.5	4	15	800	0	1	0	0	0	0	1
Megachile nigriventris SCHENCK, 1868	1	3	1	oligolectic	above	solitary	6.5	4	15	1050	1	0	0	0	1	0	2
Andrena aberrans EVERSMANN, 1852	5	6	3	oligolectic	ground	solitary	5	3	15.5	400	0	1	0	0	0	1	2
Bombus mendax GERSTÄCKER, 1869	1	4	2	polylectic	ground	social	7	7	15.5	2300	0	1	0	0	0	0	1
Halictus quadricinctus (FABRICIUS, 1776)	3	4	3	polylectic	ground	solitary	6.5	6	15.5	1050	0	1	0	0	0	1	2
Bombus gerstaeckeri MORAWITZ, 1882	unknown	6	2	oligolectic	ground	social	8	5	16	1900	0	0	0	0	1	1	2
Megachile lagopoda (LINNAEUS, 1761)	4	5	3	polylectic	ground and above	solitary	7	3	16	800	0	1	0	0	0	1	2
Bombus campestris (PANZER, 1801)	1	2	2	cuckoo	host nest	cuckoo	6.5	4	16.5	1050	0	0	1	1	1	1	4
Xylocopa iris (CHRIST, 1791)	6	7	6	polylectic	above	solitary	7	7	16.5	400	0	0	0	0	1	0	1
Andrena nasuta GIRAUD, 1863	4	4	4	oligolectic	ground	solitary	5.5	2	17	400	0	1	0	0	0	0	1
Bombus flavidus EVERSMANN, 1852	3	4	insufficient data	cuckoo	host nest	cuckoo	7.5	4	17	1900	1	0	0	0	1	0	2
Megachile parietina (GEOFFROY, 1785)	5	6	5	polylectic	above	solitary	5.5	6	17	800	0	1	0	0	0	1	2
Bombus barbutellus (KIRBY, 1802)	1	2	2	cuckoo	host nest	cuckoo	5.5	4	18	1050	0	0	1	1	1	1	4
Bombus norvegicus (SPARRE-SCHNEIDER, 1918)	1	3	2	cuckoo	host nest	cuckoo	6	5	20	1050	1	0	0	1	1	1	4
Bombus rupestris (FABRICIUS, 1793)	1	2	2	cuckoo	host nest	cuckoo	6	5	20	1050	0	0	1	1	1	1	4
Bombus vestalis (GEOFFROY, 1785)	1	3	2	cuckoo	host nest	cuckoo	6	5	21	800	0	0	1	1	1	1	4
Xylocopa violacea (LINNAEUS, 1758)	1	3	1	polylectic	above	solitary	6.5	8	22.5	800	0	0	1	1	0	0	2
Bombus bohemicus SEIDL, 1838	1	2	2	cuckoo	host nest	cuckoo	6	5	24	1050	0	0	1	1	1	1	4
Bombus quadricolor (LEPELETIER, 1832)	4	5	3	cuckoo	host nest	cuckoo	6.5	6	24	1050	1	1	0	1	1	1	5

## Sheet: definitions
Category	Variable name	Explanation
Response	Redlist	redlist status (extinction risk): 1=not threatened; 2=near-threatened; 3=threatened; 4=highly threatened; 5=almost extinct; 6=extinct
variables	Abundance	species abundance: 1=abundant; 2=common; 3=frequent; 4=occasional; 5=rare; 6=extremely rare; 7=extinct
	Population.trend	long-term population trend: 1=increase; 2=no change; 3=small decline; 4=decline; 5=large decline; 6=extinct
	Pollen.specialisation	polylectic / oligolectic / cuckoo
	Nest.location	nesting: above ground / in ground and above ground / in ground / host nest
Functional	Sociality	social / solitary / cuckoo
traits	Mean.flight.month	mean month of flight activity
	Duration.of.activity	duration of flight activity (in months)
	Size.mean	mean female body length
	Altitude.mean	mean altitudinal occurrence (in meter above sea-level)
	Forest	occurrence in forests (1=yes; 0=no)
	Raw.soil	occurrence in raw-soil sites (1=yes; 0=no)
Habitat	Urban.areas	occurrence in urban areas (1=yes; 0=no)
preferences	Meadows	occurrence in meadows (1=yes; 0=no)
	Hedgerows	occurrence in hedgerows (1=yes; 0=no)
	Wasteland	occurrence in wasteland (1=yes; 0=no)
	Habitat.breadth	number of habitats occupied by a species (1–6)
